# Supplementary material for: Cost Effectiveness of DCISionRT for Guiding Treatment of Ductal Carcinoma in Situ
Source: PubMed Central journal article supplement (PMC7083239; doi:10.1093/jncics/pkaa004), 2020-01-31

**Supplementary Table 1.** Markov Model Costs, Utilities and Probabilities

|                                                                           |                                                    |
|---------------------------------------------------------------------------|----------------------------------------------------|
| <u>Health State</u>                                                       | <u>Utility<sup>4</sup></u>                         |
| Lumpectomy and RT without recurrence                                      | 0.90                                               |
| Lumpectomy and RT with invasive local recurrence salvaged with mastectomy | 0.81                                               |
| Lumpectomy and RT with DCIS recurrence salvaged with mastectomy           | 0.88                                               |
| Lumpectomy without recurrence                                             | 0.90                                               |
| Lumpectomy with invasive local recurrence salvaged with mastectomy        | 0.84                                               |
| Lumpectomy with DCIS recurrence salvaged with conservative surgery and RT | 0.90                                               |
| Lumpectomy with DCIS recurrence salvaged with mastectomy                  | 0.89                                               |
| Death                                                                     | 0                                                  |
| <u>Procedure</u>                                                          | <u>Cost (\$)</u>                                   |
| DCISionRT test                                                            | 5,435                                              |
| RT after lumpectomy                                                       | 11,507                                             |
| Lumpectomy and RT after DCIS recurrence                                   | 15,205                                             |
| Mastectomy after DCIS recurrence                                          | 6,824                                              |
| Lumpectomy and RT after invasive local recurrence                         | 16,728                                             |
| Mastectomy after invasive local recurrence                                | 7,218                                              |
| <u>States</u>                                                             | <u>Probability<sup>3</sup></u><br><u>(10-year)</u> |
| Having an elevated-risk score                                             | 0.52                                               |
| Having a low-risk score                                                   | 0.48                                               |
| DCIS recurrence for low risk score treated without adjuvant RT            | 0.04                                               |
| Invasive recurrence for low risk score treated without adjuvant RT        | 0.04                                               |
| DCIS recurrence for low risk score treated with adjuvant RT               | 0.04                                               |
| Invasive recurrence for low risk score treated with adjuvant RT           | 0.03                                               |
| DCIS recurrence for elevated risk score treated without adjuvant RT       | 0.08                                               |
| Invasive recurrence for elevated risk score treated without adjuvant RT   | 0.15                                               |
| DCIS recurrence for elevated risk score treated with adjuvant RT          | 0.02                                               |
| Invasive recurrence for elevated risk score treated with adjuvant RT      | 0.09                                               |

**Supplementary Figure 1.** Sensitivity analyses varying the utilities of the no evidence of disease without adjuvant RT (NED-OBS) and no evidence of disease after adjuvant radiation therapy (NED-RT). The utilities of the NED-OBS and NED-RT states were the same (0.90) in the base case model. (A) Varying the utility of the NED-OBS state. (B) Varying the utility of the NED-RT state.

**A.**

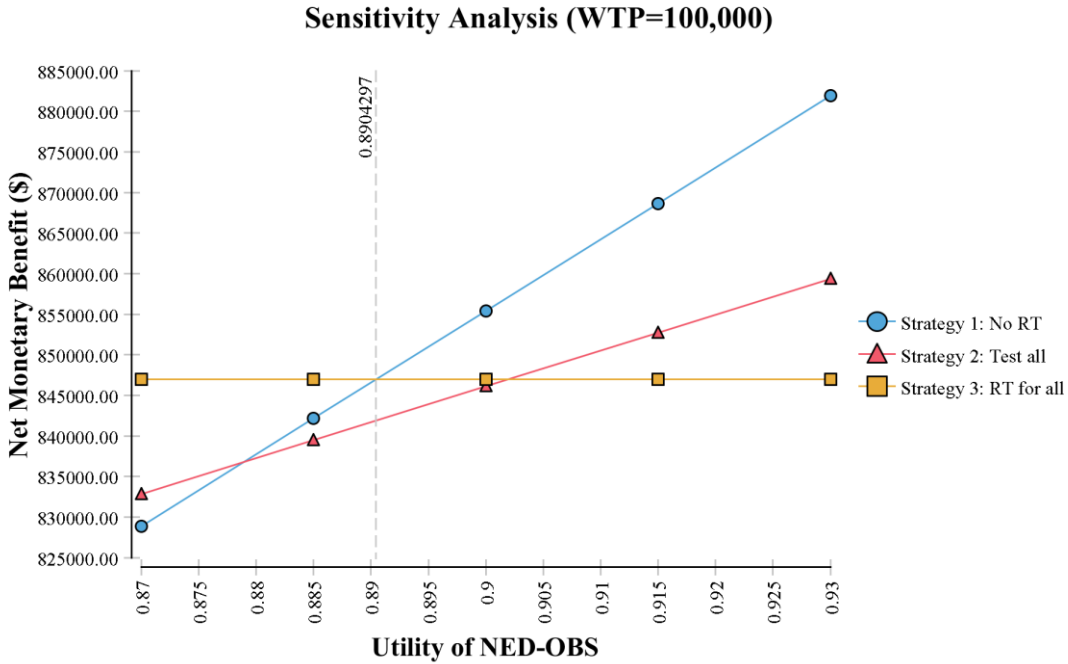

**B.**

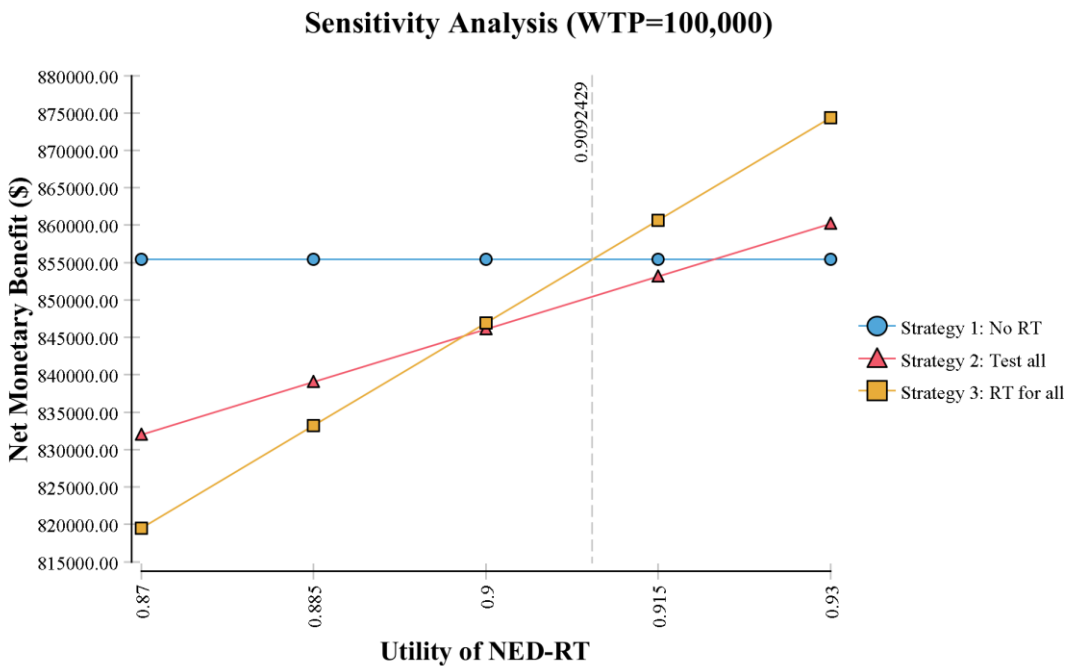

Supplement: pkaa004_supplementary_data.pdf [file pkaa004_supplementary_data.pdf]
